# Supplementary material
Source: Springer Nature journal article supplement (https://www.springermedizin.de/resource/supplementary/13063_2009_327_MOESM4_ESM.pdf/9617988)
Supplement: MOESM4 [file 9617988]

A sample size program for n-stage trial designs by Friederike Barthel & Patrick Royston based on P Royston, M Parmar & W Qian 2003

OPERATING CHARACTERISTICS

DESIGN FOR 4 STAGES

|         | Al pha(1S) | Power | HR H0 | HR H1 | Cri t. HR | Length* | Time   |
|---------|------------|-------|-------|-------|-----------|---------|--------|
| STAGE 1 | 0.5000     | 0.950 | 1.000 | 0.750 | 1.000     | 9.744   | 9.744  |
| STAGE 2 | 0.2500     | 0.951 | 1.000 | 0.750 | 0.924     | 4.480   | 14.224 |
| STAGE 3 | 0.1000     | 0.951 | 1.000 | 0.750 | 0.886     | 4.363   | 18.588 |
| STAGE 4 | 0.0250     | 0.900 | 1.000 | 0.750 | 0.844     | 8.702   | 27.290 |
| Overall | 0.0133     | 0.847 |       |       |           | 27.290  |        |

\* Length (duration of each stage) is expressed in one quarter (3 months) periods

SAMPLE SIZE AND NUMBER OF EVENTS

|           | -----STAGE 1----- |         |        | -----STAGE 2----- |         |        |
|-----------|-------------------|---------|--------|-------------------|---------|--------|
|           | Overall           | Control | Exper. | Overall           | Control | Exper. |
| Arms      | 6                 | 1       | 5      | 6                 | 1       | 5      |
| Acc. rate | 125               | 36      | 89     | 125               | 36      | 89     |
| Patients* | 1218              | 348     | 870    | 1778              | 508     | 1270   |
| Events**  | 343               | 113     | 230    | 661               | 216     | 445    |

|           | -----STAGE 3----- |         |        | -----STAGE 4----- |         |        |
|-----------|-------------------|---------|--------|-------------------|---------|--------|
|           | Overall           | Control | Exper. | Overall           | Control | Exper. |
| Arms      | 6                 | 1       | 5      | 6                 | 1       | 5      |
| Acc. rate | 125               | 36      | 89     | 125               | 36      | 89     |
| Patients* | 2323              | 664     | 1660   | 3411              | 975     | 2437   |
| Events**  | 1034              | 334     | 700    | 1228              | 403     | 825    |

0.5 patients allocated to each E arm for every 1 to control arm.

\* Patients and events are cumulative over the stages

\*\* Events are for I-outcome at stages 1 to 3, D-outcome at stage 4

Approx. prob. of k experimental arms reaching stage 2:

| k (#arms) | 0     | 1     | 2     | 3     | 4     | 5     |
|-----------|-------|-------|-------|-------|-------|-------|
| Under H0  | 0.031 | 0.156 | 0.313 | 0.313 | 0.156 | 0.031 |
| Under H1  | 0.000 | 0.000 | 0.001 | 0.021 | 0.204 | 0.774 |

Approx. prob. of k experimental arms reaching stage 3:

| k (#arms) | 0     | 1     | 2     | 3     | 4     | 5     |
|-----------|-------|-------|-------|-------|-------|-------|
| Under H0  | 0.237 | 0.383 | 0.214 | 0.044 | 0.003 | 0.000 |
| Under H1  | 0.000 | 0.000 | 0.001 | 0.021 | 0.196 | 0.601 |

Approx. prob. of k experimental arms reaching stage 4:

| k (#arms) | 0     | 1     | 2     | 3     | 4     | 5     |
|-----------|-------|-------|-------|-------|-------|-------|
| Under H0  | 0.590 | 0.250 | 0.027 | 0.001 | 0.000 | 0.000 |
| Under H1  | 0.000 | 0.000 | 0.001 | 0.021 | 0.197 | 0.603 |
